# Supplementary material
Source: publisher figshare collection journal article supplement (https://sage.figshare.com/ndownloader/files/12143765)
Supplement: Supplementary file 1 [file 12143765]

## Sheet: Sheet1
CONTINENT	FACTOR RATING	SUB-DDN #	GEOGRAPHIC NAME	CHANNEL TYPE	GOOGLE EARTH FEATURES	WIND GAP ELEVATION	PALEOSHORELINE FROM CC BORDER AVG ELEV	CC PALEOSHORELINE-WIND GAP	CC OUTLINE>WIND GAP (w/in 3m)	PUBLISHED PALEOSHORELINE	PUBL PALEOSHORELINE-WIND GAP	PUBL PALEOSHORELINE>WIND GAP	Channel: well-def = 1, poorly def = 0	Google Earth features indicate possible channel = 1	Fault = -1	Pub paleoshore-wind gap > -3 = 1; (<-3) -1	(CC paleoshore-wind gap >= --3): 1, (<-3) -1	Score	FACTOR RATING	CONNECTIVITY
AU	Primarily climatic	1-1		erosional, well-defined	null	569.967	568.139	-1.828	Yes				1				1	2	Primarily climatic	Probable
AU	Primarily tectonic	1-2	Lake Lewis	erosional, well-defined	null, GA PV	568.399	558.23	-10.169	No	560	-8.399	No	1			-1	-1	-1	Primarily tectonic	Probable
AU	Mixed climatic-tectonic	1-3		erosional, poorly defined	trains of dried water bodies, GA PV	561.842	558.2	-3.642	No				0	1			-1	0	Mixed climatic-tectonic	Probable
AU	Primarily climatic	1-4		erosional, well-defined	trains of dried water bodies	561.125							1				0	1	Primarily climatic	Probable
AU	Primarily climatic	1-5		erosional, well-defined	null	557.61							1				0	1	Primarily climatic	Probable
AU	Primarily climatic	1-6		erosional, well-defined	trains of dried water bodies, GA fault, GA PV	549.589	547.847	-1.742	Yes				1		-1		1	1	Primarily climatic	Probable
AU	Mixed climatic-tectonic	1-7		erosional, poorly defined	trains of dried water bodies	522.528	517.947	-4.581	No				0	1			-1	0	Mixed climatic-tectonic	Probable
AU	Primarily climatic	1-8		erosional, well-defined	null	521.853							1				0	1	Primarily climatic	Probable
AU	Mixed climatic-tectonic	1-9		erosional, poorly defined	null	520.372							0				0	0	Mixed climatic-tectonic	Probable
AU	Primarily climatic	1-10		erosional, well-defined	null	508.286							1				0	1	Primarily climatic	Probable
AU	Mixed climatic-tectonic	2-1		erosional, well-defined	trains of dried water bodies	492.618	488.161	-4.457	No				1				-1	0	Mixed climatic-tectonic	Probable
AU	Primarily climatic	2-2	Lake Amadeus, Lake Hopkins	erosional, well-defined	trains of dried water bodies, GA fault	480.84	478.174	-2.666	Yes				1		-1		1	1	Primarily climatic	Probable
AU	Mixed climatic-tectonic	3-1		erosional, poorly defined	null	447.041							0				0	0	Mixed climatic-tectonic	Probable
AU	Mixed climatic-tectonic	3-2	Lake Anec	erosional, well-defined	null, GA PV	441.513	438.078	-3.435	No				1				-1	0	Mixed climatic-tectonic	Probable
AU	Mixed climatic-tectonic	3-3	Lake Macdonald	erosional, poorly defined	trains of dried water bodies	432.033	428.184	-3.849	No				0	1			-1	0	Mixed climatic-tectonic	Probable
AU	Mixed climatic-tectonic	3-4	Lake Macdonald	erosional, well-defined	null	431.544	428.184	-3.36	No				1				-1	0	Mixed climatic-tectonic	Probable
AU	Primarily climatic	3-5		erosional, well-defined	trains of dried water bodies	428.358							1				0	1	Primarily climatic	Probable
AU	Primarily tectonic	4-1		erosional, poorly defined	connects two salt lakes, GA PV	382.502	378.191	-4.311	No				0	1			-1	0	Mixed climatic-tectonic	Probable
AU	Primarily climatic	4-2	Lake Mackay	erosional, well-defined	null, GA fault, GA PV	370.065	368.192	-1.873	Yes				1		-1		1	1	Primarily climatic	Probable
AU	Primarily climatic	5-1		erosional, well-defined	paleochannel from vegetation, GA PV	395.417							1				0	1	Primarily climatic	Probable
AU	Mixed climatic-tectonic	5-2	Bullocks Head Lake	erosional, well-defined	trains of dried water bodies	393.236	388.192	-5.044	No				1				-1	0	Mixed climatic-tectonic	Probable
AU	Primarily tectonic	5-3		erosional, poorly defined	null	382.621	378.318	-4.303	No				0				-1	-1	Primarily tectonic	Probable
AU	Mixed climatic-tectonic	5-4		erosional, poorly defined	trains of dried water bodies, GA PV	354.226	348.208	-6.018	No				0	1			-1	0	Mixed climatic-tectonic	Probable
AU	Primarily tectonic	5-5	Lake White	erosional, well-defined	trains of dried water bodies, GA fault, GA PV	343.349	338.133	-5.216	No				1		-1		-1	-1	Primarily tectonic	Probable
AU	Mixed climatic-tectonic	5-6		erosional, well-defined	trains of dried water bodies, GA fault, GA PV	314.318							1		-1		0	0	Mixed climatic-tectonic	Probable
AU	Mixed climatic-tectonic	6-1		erosional, well-defined	null	302.509	298.153	-4.356	No				1				-1	0	Mixed climatic-tectonic	Probable
AU	Primarily climatic	6-2		erosional, well-defined	faint trace more vegetation	300.182	298.028	-2.154	Yes				1				1	2	Primarily climatic	Probable
AU	Primarily climatic	6-3		erosional, well-defined	faint trace more vegetation	281.478							1				0	1	Primarily climatic	Probable
AU	Primarily climatic	6-4	Lake Surprise, salt lake	erosional, poorly defined	trains of dried water bodies	238.521							0	1			0	1	Primarily climatic	Probable
AU	Primarily climatic	6-5		erosional, well-defined	null	225.631							1				0	1	Primarily climatic	Probable
AU	Mixed climatic-tectonic	7-1		erosional, well-defined	trace of darker vegetation, trains of dried water bodies	271.696	268.032	-3.664	No				1				-1	0	Mixed climatic-tectonic	Probable
AU	Primarily climatic	7-2		erosional, poorly defined	null	260.79	258.253	-2.537	Yes				0				1	1	Primarily climatic	Probable
AU	Mixed climatic-tectonic	7-3		erosional, poorly defined	darker vegetation	260.113	248.141	-11.972	No				0	1			-1	0	Mixed climatic-tectonic	Probable
AU	Primarily climatic	7-4		erosional, poorly defined	trains of dried water bodies	258.615	258.198	-0.417	Yes				0	1			1	2	Primarily climatic	Probable
AU	Primarily climatic	7-5		erosional, poorly defined	faint trace more vegetation	258.495							0	1			0	1	Primarily climatic	Probable
AU	Primarily climatic	7-6		erosional, well-defined	greener vegetation	255.128							1				0	1	Primarily climatic	Probable
AU	Primarily climatic	7-7		erosional, well-defined	null	251.217							1				0	1	Primarily climatic	Probable
AU	Primarily climatic	7-8		erosional, well-defined	null	250.266	248.271	-1.995	Yes				1				1	2	Primarily climatic	Probable
AU	Primarily climatic	7-9		erosional, well-defined	null	249.614							1				0	1	Primarily climatic	Probable
AU	Primarily climatic	7-10		erosional, well-defined	null	249.003	248.168	-0.835	Yes				1				1	2	Primarily climatic	Probable
AU	Primarily climatic	7-11		erosional, well-defined	null	247.509							1				0	1	Primarily climatic	Probable
AU	Mixed climatic-tectonic	7-12		erosional, poorly defined	null	244.511							0				0	0	Mixed climatic-tectonic	Probable
AU	Primarily climatic	7-13		erosional, well-defined	faint trace more vegetation	242.89							1				0	1	Primarily climatic	Probable
AU	Mixed climatic-tectonic	7-14		erosional, well-defined	null	242.283	238.193	-4.09	No				1				-1	0	Mixed climatic-tectonic	Probable
AU	Primarily climatic	7-15		erosional, well-defined	null	241.209							1				0	1	Primarily climatic	Probable
AU	Mixed climatic-tectonic	7-16		erosional, poorly defined	null	237.491							0				0	0	Mixed climatic-tectonic	Probable
AU	Mixed climatic-tectonic	7-17		erosional, poorly defined	null	237.47							0				0	0	Mixed climatic-tectonic	Probable
AU	Mixed climatic-tectonic	7-18		erosional, poorly defined	null	236.506							0				0	0	Mixed climatic-tectonic	Probable
AU	Mixed climatic-tectonic	7-19		erosional, well-defined	null	234.411	228.124	-6.287	No				1				-1	0	Mixed climatic-tectonic	Probable
AU	Primarily climatic	7-20		erosional, well-defined	null	234.063							1				0	1	Primarily climatic	Probable
AU	Mixed climatic-tectonic	7-21		erosional, poorly defined	null	234							0				0	0	Mixed climatic-tectonic	Probable
AU	Primarily tectonic	7-22		erosional, poorly defined	null	233.779	228.104	-5.675	No				0				-1	-1	Primarily tectonic	Probable
AU	Mixed climatic-tectonic	7-23		erosional, poorly defined	within salt lake boundaries	232.204	228.259	-3.945	No				0	1			-1	0	Mixed climatic-tectonic	Probable
AU	Mixed climatic-tectonic	7-24		erosional, poorly defined	null	232.19							0				0	0	Mixed climatic-tectonic	Probable
AU	Mixed climatic-tectonic	7-25		erosional, poorly defined	null	232.023							0				0	0	Mixed climatic-tectonic	Probable
AU	Mixed climatic-tectonic	7-26		erosional, poorly defined	null	231.988							0				0	0	Mixed climatic-tectonic	Probable
AU	Primarily climatic	7-27		erosional, well-defined	within salt lake boundaries	230.644	228.228	-2.416	Yes				1				1	2	Primarily climatic	Probable
AU	Primarily climatic	7-28		erosional, poorly defined	within salt lake boundaries	229.199	228.241	-0.958	Yes				0	1			1	2	Primarily climatic	Probable
AU	Mixed climatic-tectonic	7-29		erosional, poorly defined	null	229.057							0				0	0	Mixed climatic-tectonic	Probable
AU	Primarily climatic	7-30		erosional, well-defined	null	228.186	228.146	-0.04	Yes				1				1	2	Primarily climatic	Probable
AU	Primarily climatic	7-31		erosional, well-defined	null	228.129	228.165	0.036	Yes				1				1	2	Primarily climatic	Probable
AU	Primarily climatic	7-32		erosional, well-defined	null	227.693							1				0	1	Primarily climatic	Probable
AU	Primarily climatic	7-33		erosional, well-defined	within salt lake boundaries	227.193							1				0	1	Primarily climatic	Probable
AU	Primarily climatic	7-34		erosional, well-defined	null	227.028							1				0	1	Primarily climatic	Probable
AU	Primarily climatic	7-35		erosional, well-defined	null	226.873							1				0	1	Primarily climatic	Probable
AU	Mixed climatic-tectonic	7-36		erosional, poorly defined	null	226.588							0				0	0	Mixed climatic-tectonic	Probable
AU	Primarily climatic	7-37		erosional, well-defined	trains of dried water bodies	221.034							1				0	1	Primarily climatic	Probable
AU	Primarily climatic	7-38		erosional, well-defined	trains of dried water bodies	219.972	218.255	-1.717	Yes				1				1	2	Primarily climatic	Probable
AU	Primarily climatic	7-39		erosional, well-defined	within salt lake boundaries	219.49	218.162	-1.328	Yes				1				1	2	Primarily climatic	Probable
AU	Primarily climatic	7-40	Lake Woods, Tarrabool Lake, Lake Sylvester, outer Lake Woods	erosional, well-defined	faint trace more vegetation	218.46	218.204	-0.256	Yes	220	1.54	Yes	1			1	1	3	Primarily climatic	Probable
AU	Primarily climatic	7-41		erosional, well-defined	null	218.423							1				0	1	Primarily climatic	Probable
AU	Primarily climatic	7-42		erosional, well-defined	null	218.055							1				0	1	Primarily climatic	Probable
AU	Primarily climatic	7-43		erosional, well-defined	trains of dried water bodies	217.822							1				0	1	Primarily climatic	Probable
AU	Primarily climatic	7-44		erosional, well-defined	null	217.689	218.229	0.54	Yes				1				1	2	Primarily climatic	Probable
AU	Primarily climatic	7-45		erosional, well-defined	trains of dried water bodies	217.12	218.156	1.036	Yes				1				1	2	Primarily climatic	Probable
AU	Primarily climatic	7-46		erosional, well-defined	trains of dried water bodies	216.895							1				0	1	Primarily climatic	Probable
AU	Primarily climatic	7-47		erosional, well-defined	null	213.415							1				0	1	Primarily climatic	Probable
AU	Primarily climatic	7-48		erosional, well-defined	faint trace more vegetation	209.546	208.198	-1.348	Yes				1				1	2	Primarily climatic	Probable
